# Supplementary material
Source: PubMed Central journal article supplement (PMC3771533)
Supplement: NIHMS405403-supplement-1.pdf [file NIHMS405403-supplement-1.pdf]

**Supporting Information.** LIPID11 residue atom names, atom types, and atom charges.

# LIPID11: A Modular Framework for Lipid

## Simulations using Amber

*Åge A. Skjevik<sup>†</sup>, Benjamin D. Madej<sup>‡,§</sup>, Ross C. Walker<sup>‡,§,\*</sup> and Knut Teigen<sup>†,\*</sup>*

<sup>†</sup>Department of Biomedicine, University of Bergen, N-5009 Bergen, Norway

<sup>‡</sup>San Diego Supercomputer Center, University of California San Diego, La Jolla, CA 92093,  
USA

<sup>§</sup>Department of Chemistry and Biochemistry, University of California San Diego, La Jolla, CA  
92093, USA

Index of figures:

Figure S1. Phosphatidylinositol.

Figure S2. Cholesterol.

Figure S3. Phosphatidic acid (PO<sub>4</sub><sup>2-</sup>).

Figure S4. Phosphatidylcholine.

Figure S5. Phosphatidylethanolamine.

Figure S6. R-Phosphatidylglycerol.

Figure S7. S-Phosphatidylglycerol.

Figure S8. Phosphatidic acid (PHO<sub>4</sub><sup>-</sup>).

Figure S9. Phosphatidylserine.

Figure S10. Arachidonoyl.

Figure S11. Docosahexaenoyl.

Figure S12. Linolenoyl.

Figure S13. Linoleoyl.

Figure S14. Oleoyl.

Figure S15. Palmitoyl.

Figure S16. Stearoyl.

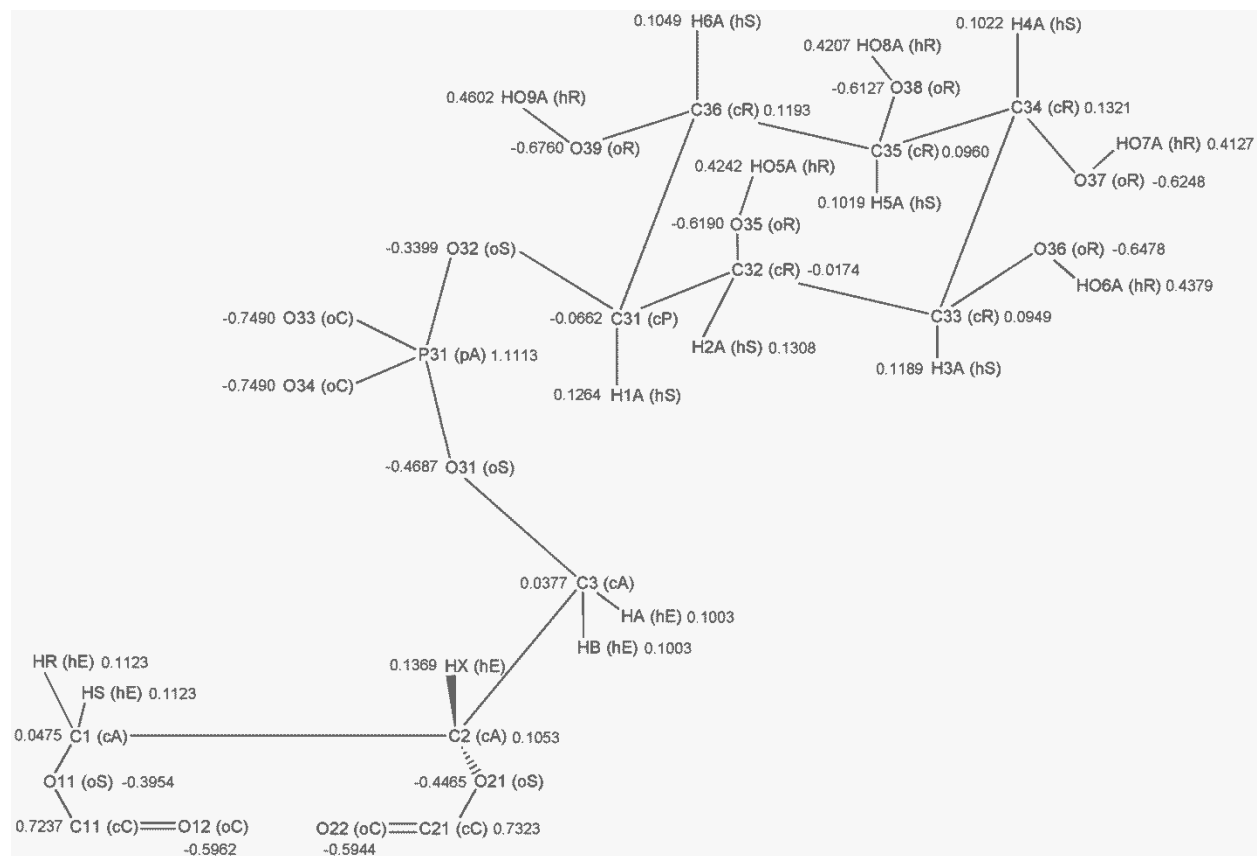

Figure S1. Phosphatidylinositol atom names, atom types, and atom charges. The LIPID11 residue name is PI. The head group residue PI contains an inositol ring with parameters based on the Glycam force field.

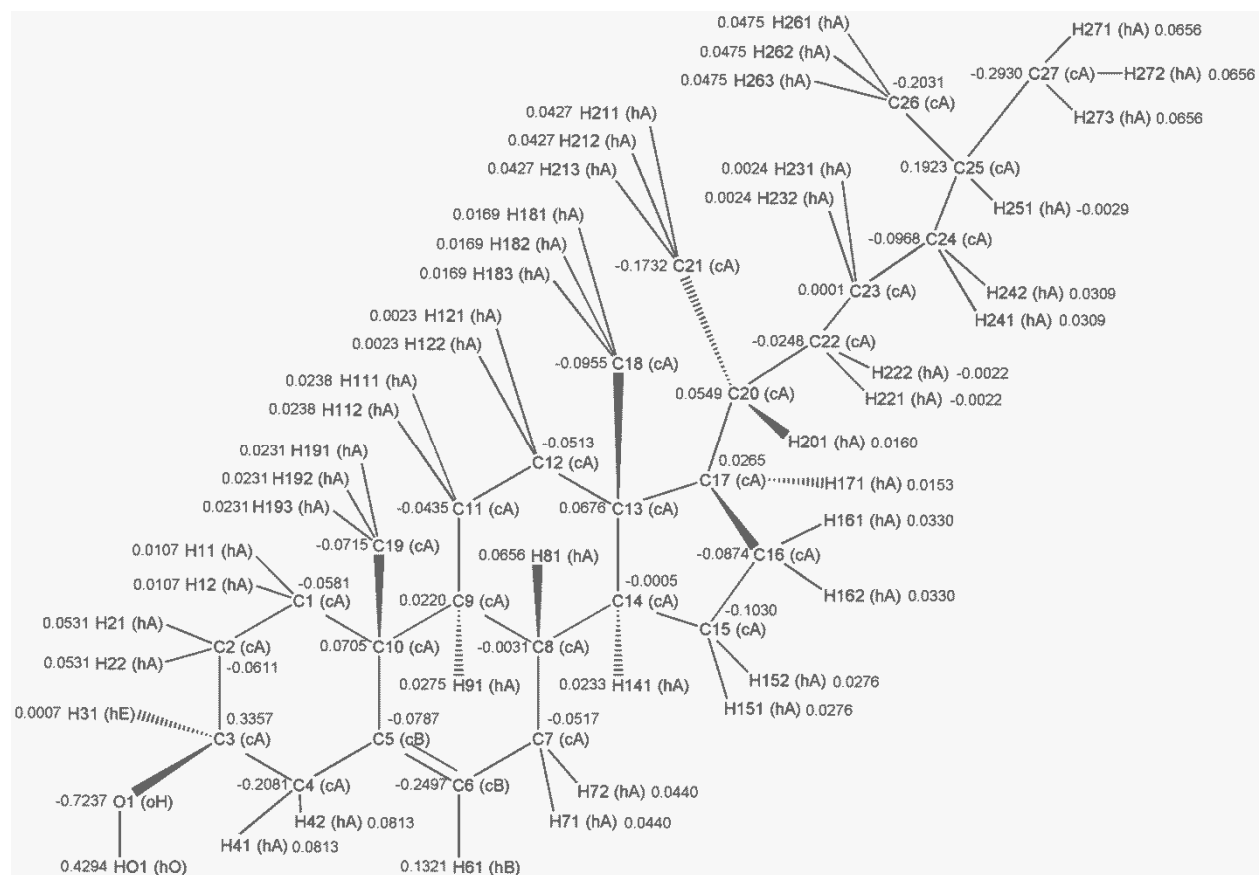

Figure S2. Cholesterol atom names, atom types, and atom charges. The LIPID11 residue name is CHL.

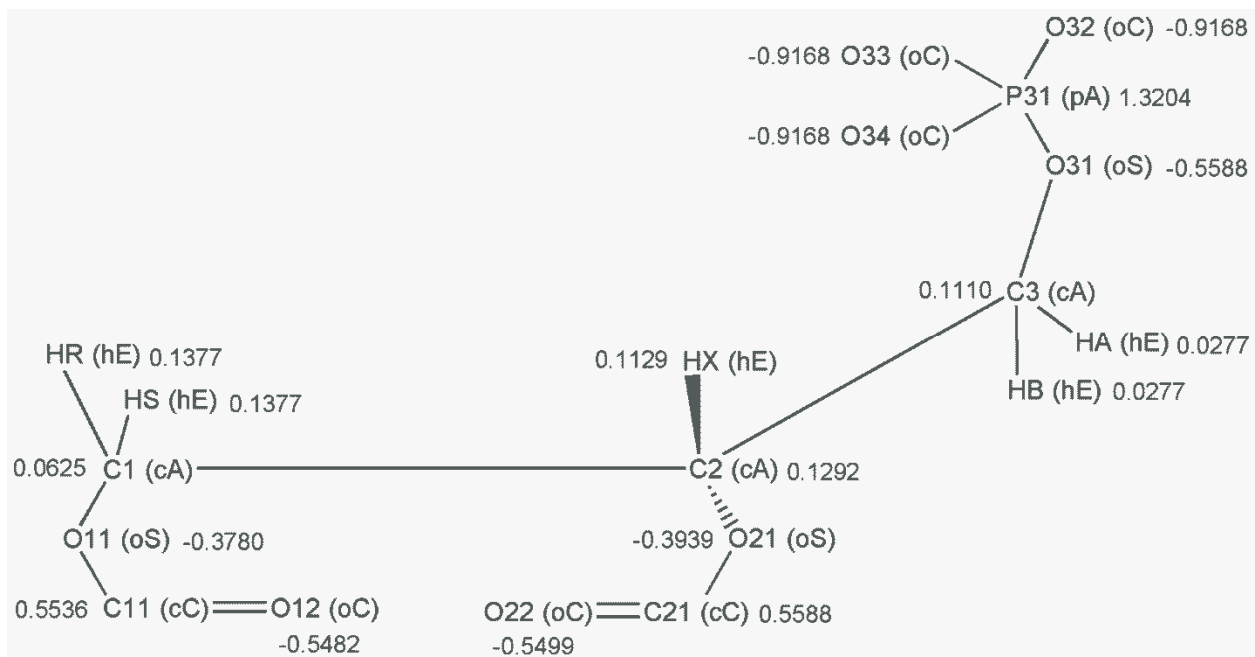

Figure S3. Phosphatidic acid (PO42-) atom names, atom types, and atom charges. The LIPID11 residue name is P2-.

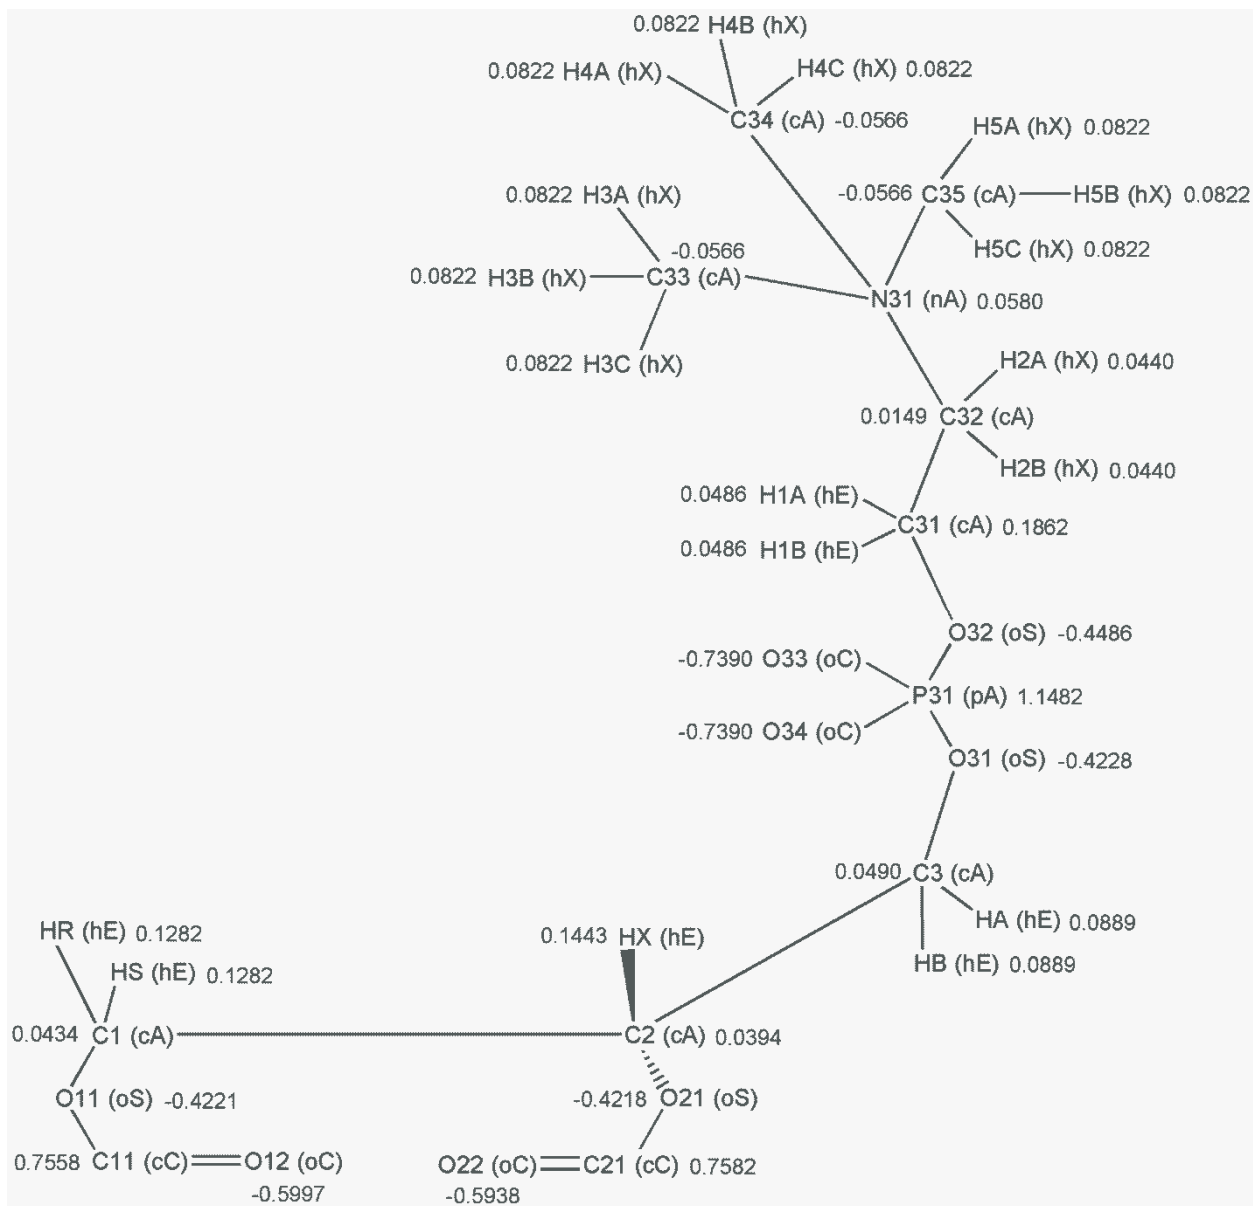

Figure S4. Phosphatidylcholine atom names, atom types, and atom charges. The LIPID11 residue name is PC.

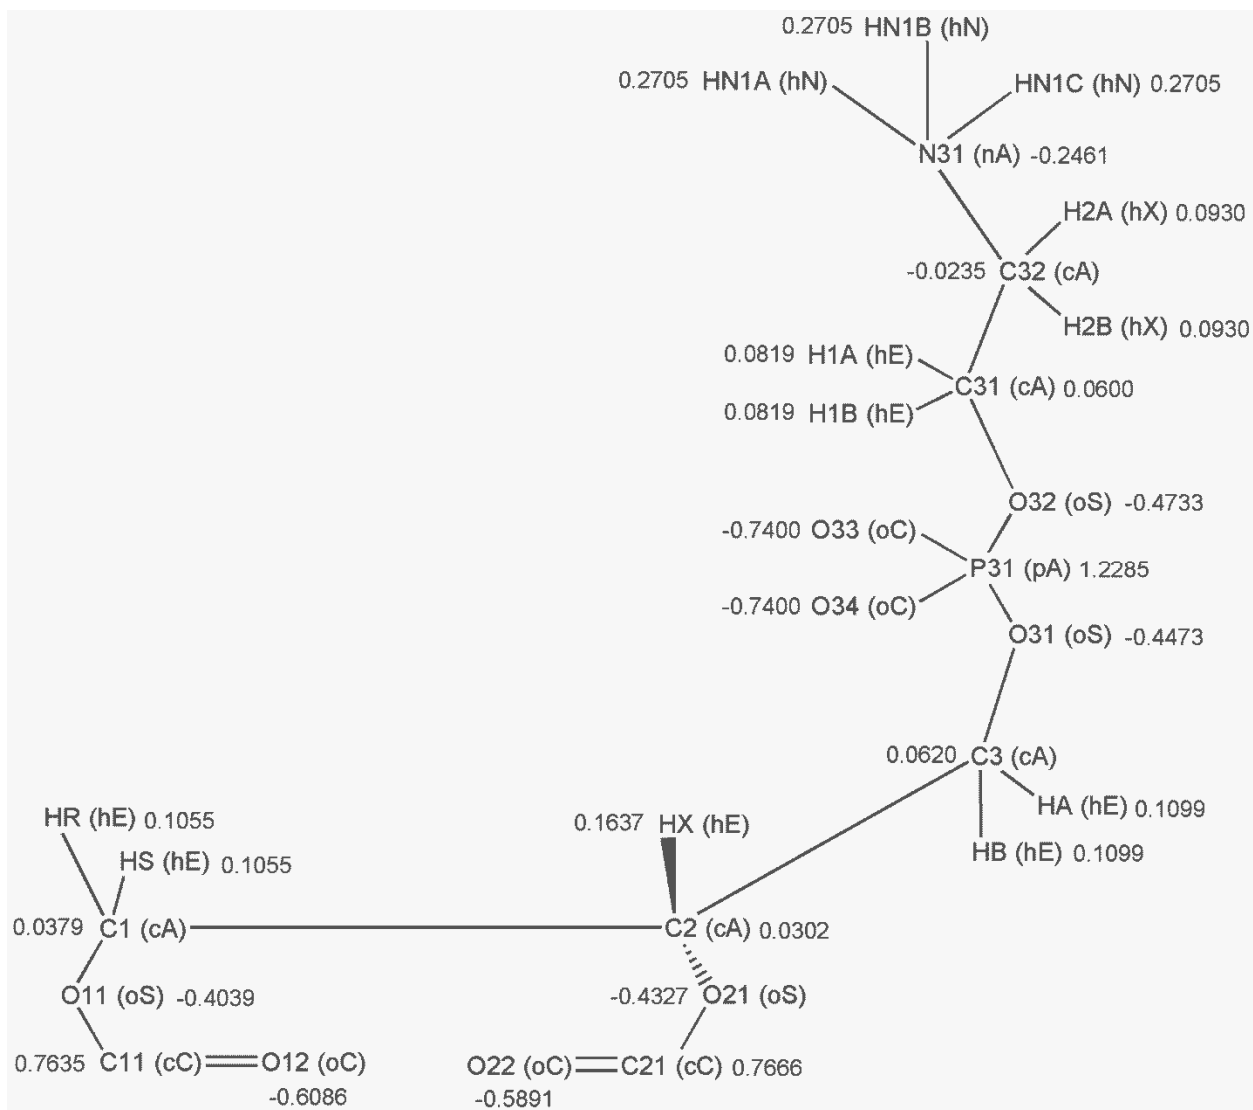

Figure S5. Phosphatidylethanolamine atom names, atom types, and atom charges. The LIPID11 residue name is PE.

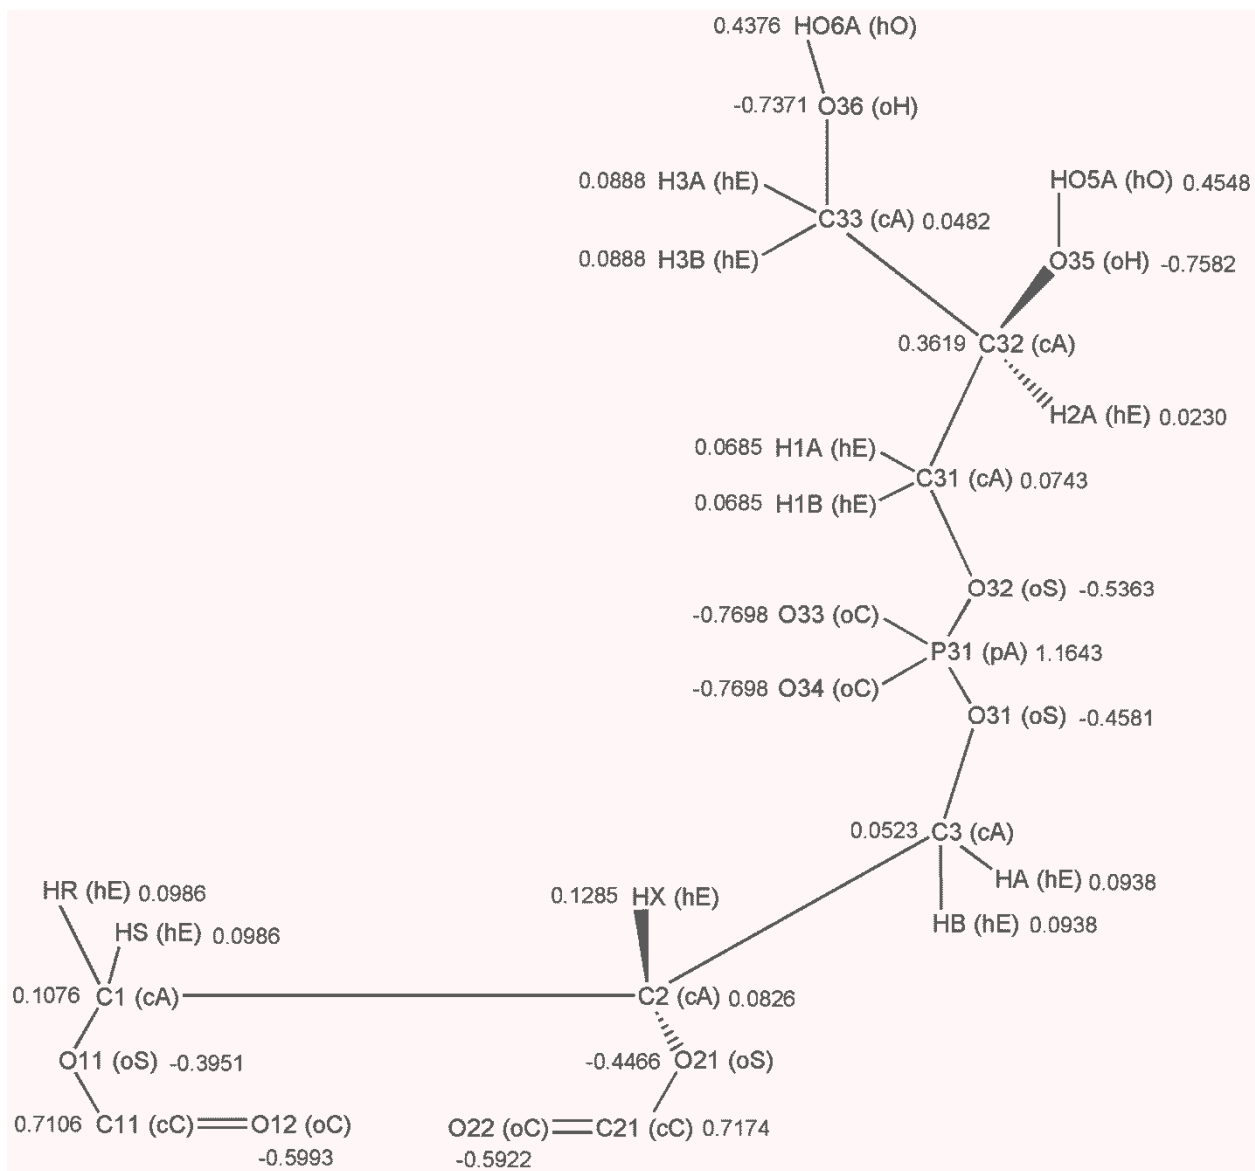



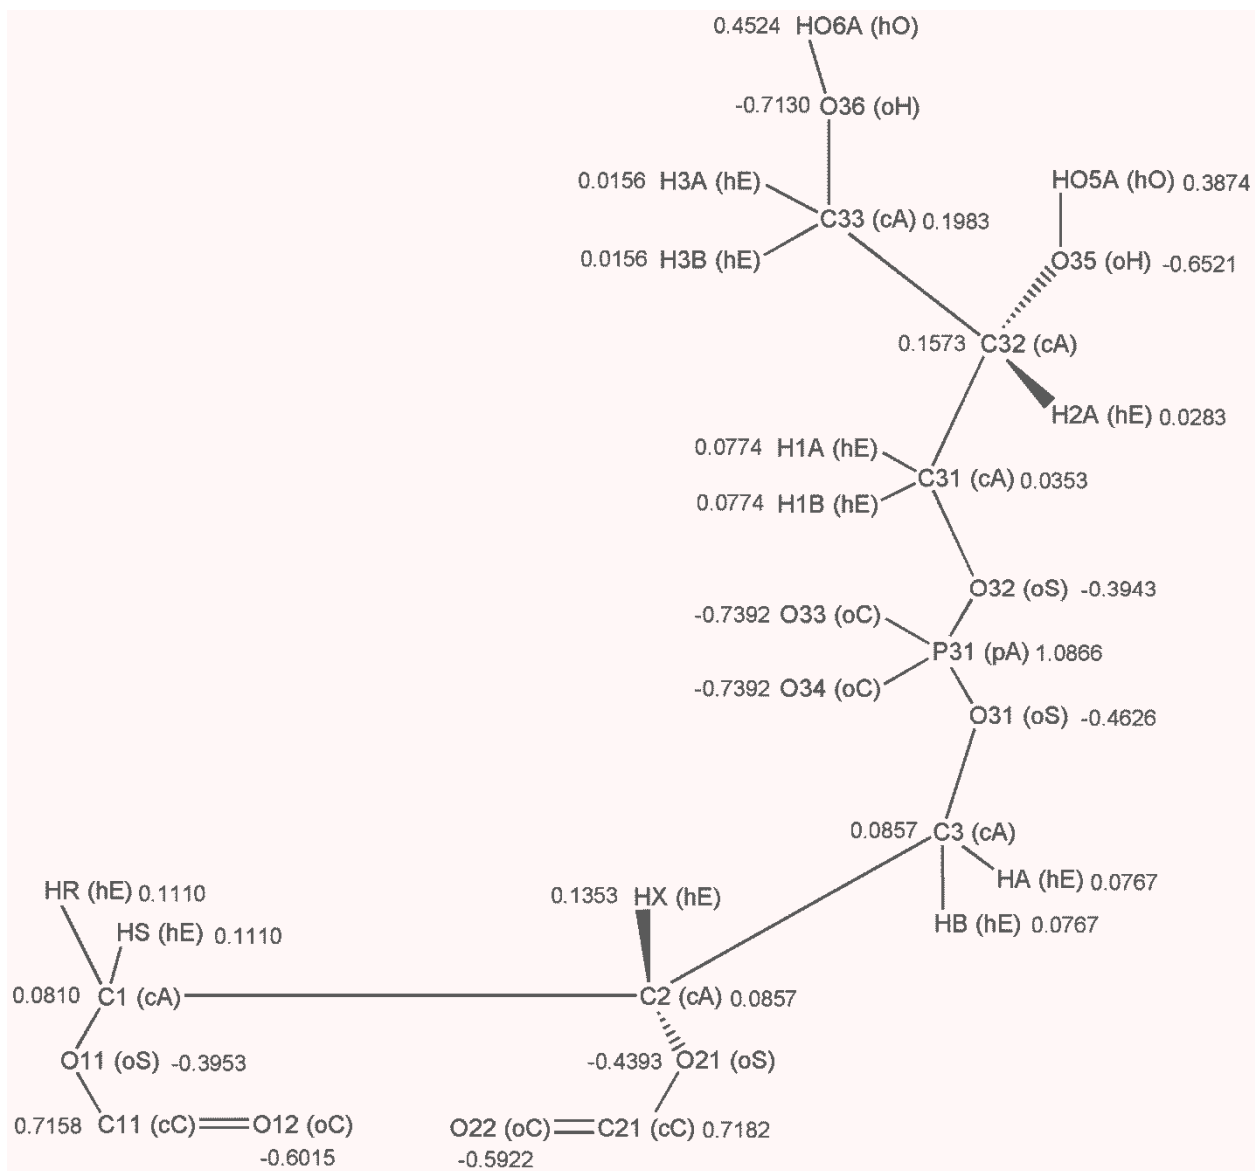

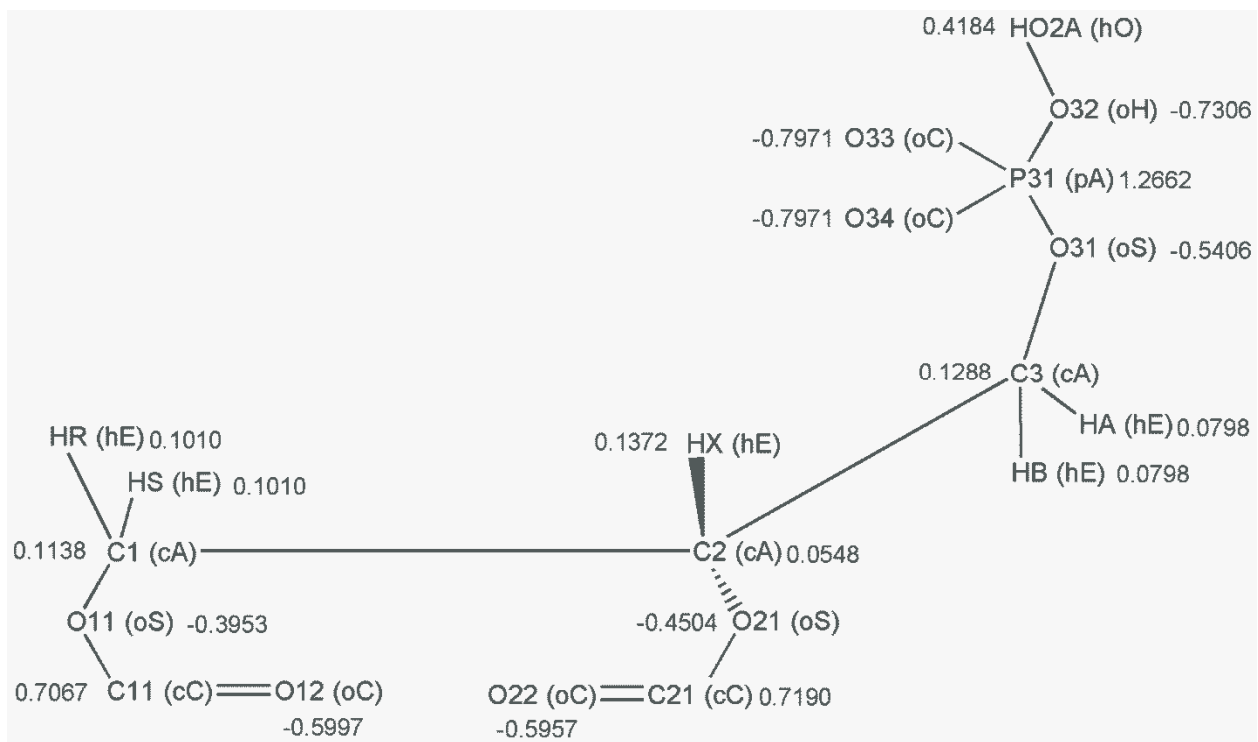

Figure S8. Phosphatidic acid (PHO4-) atom names, atom types, and atom charges. The LIPID11 residue name is PH-.

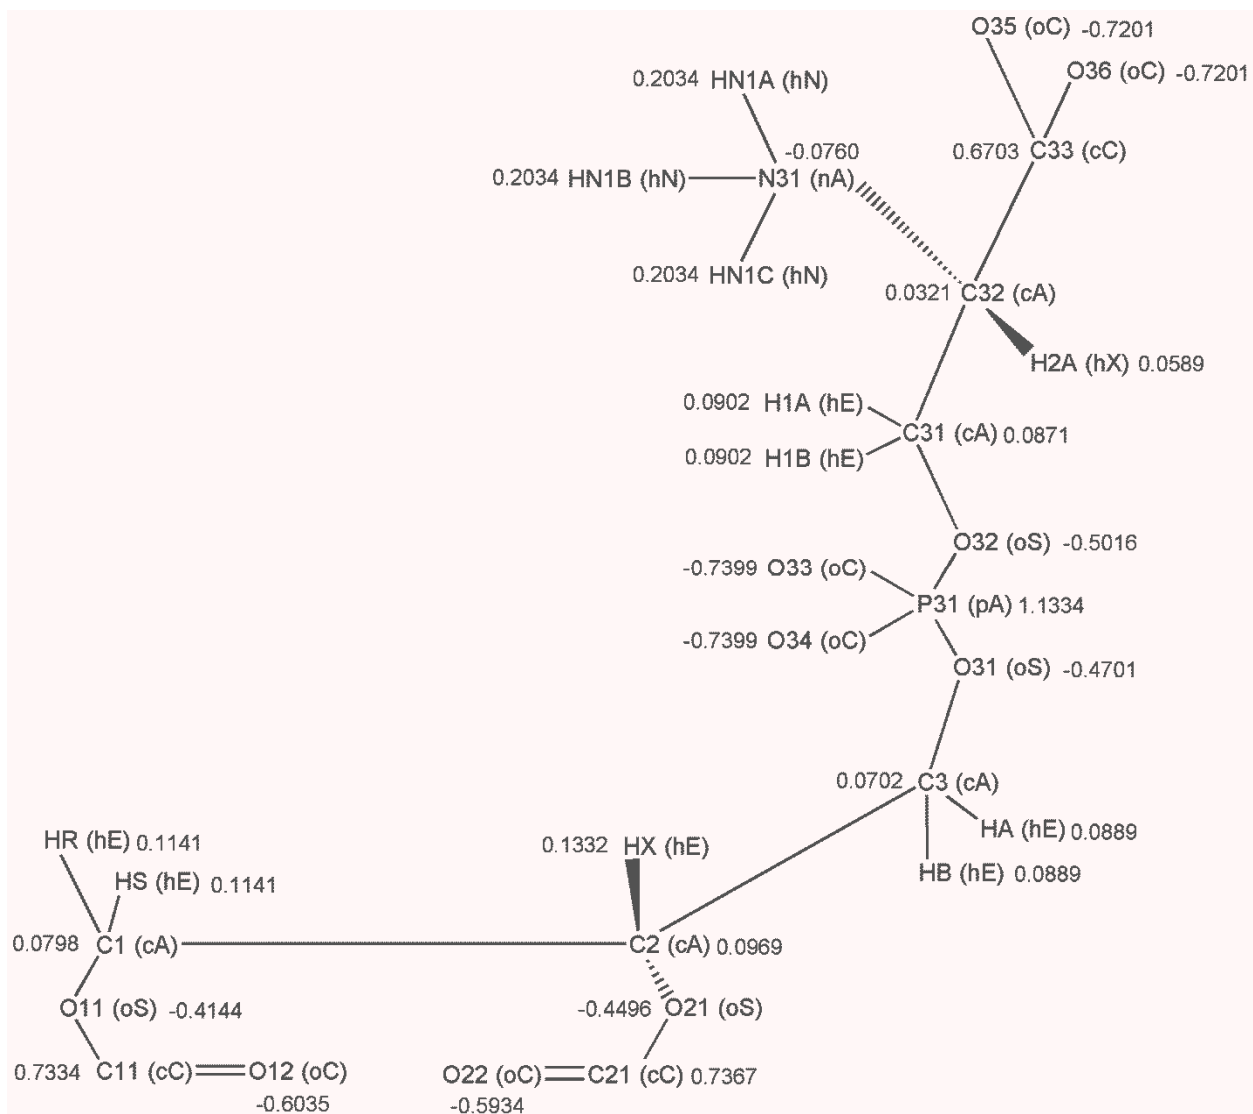

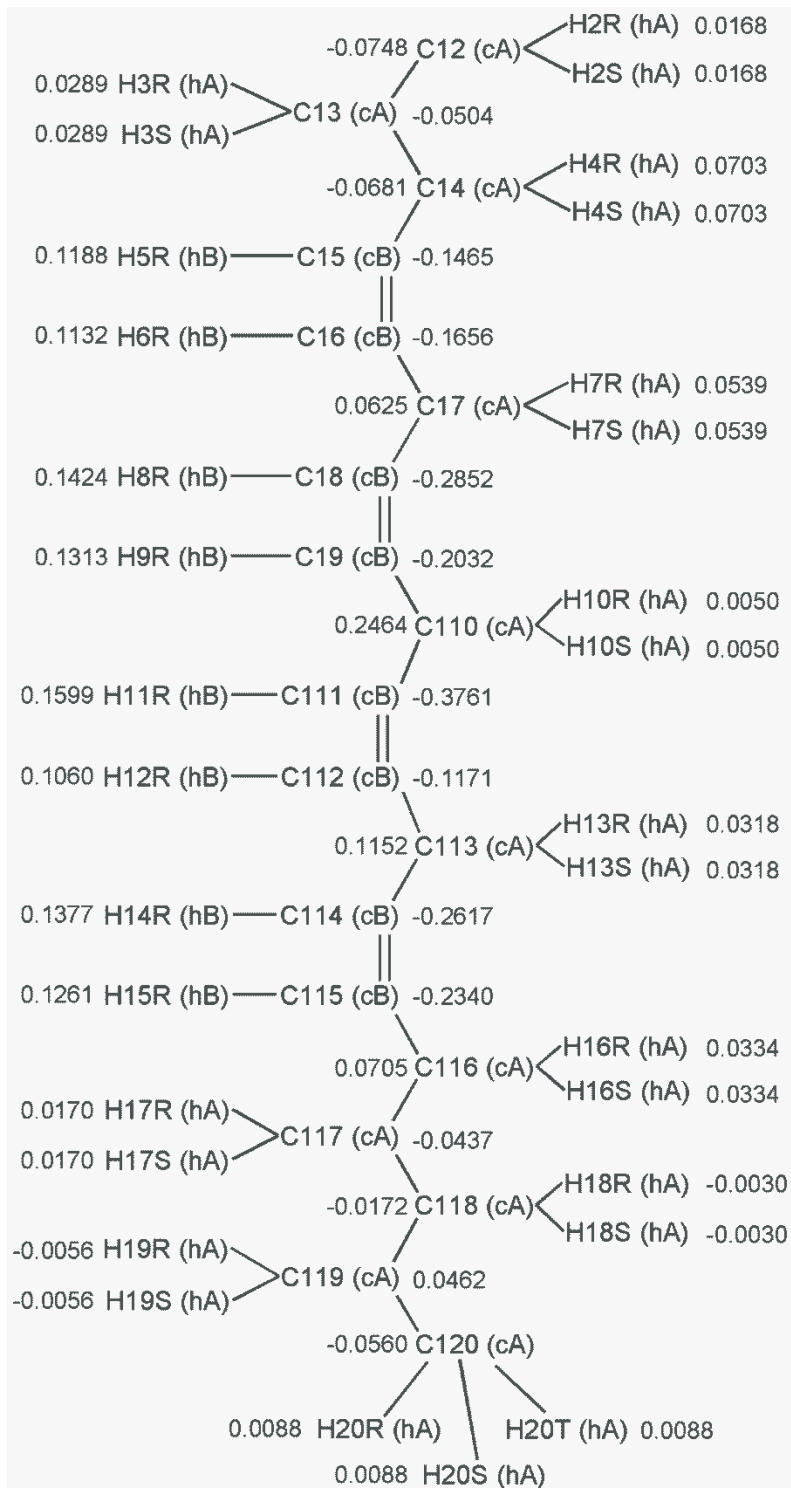

Figure S10. Arachidonoyl atom names, atom types, and atom charges. The LIPID11 residue name is AR.

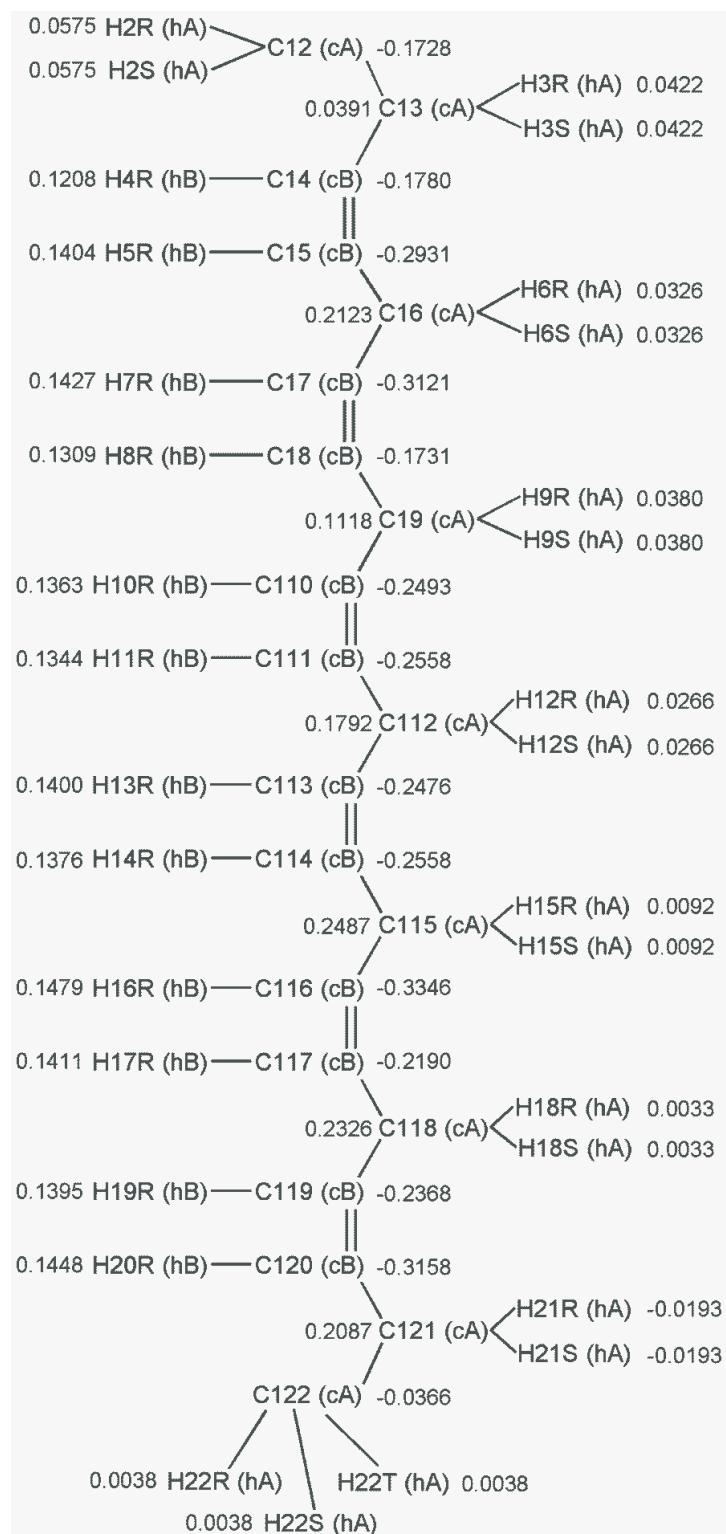

Figure S11. Docosahexaenoyl atom names, atom types, and atom charges. The LIPID11 residue name is DHA.

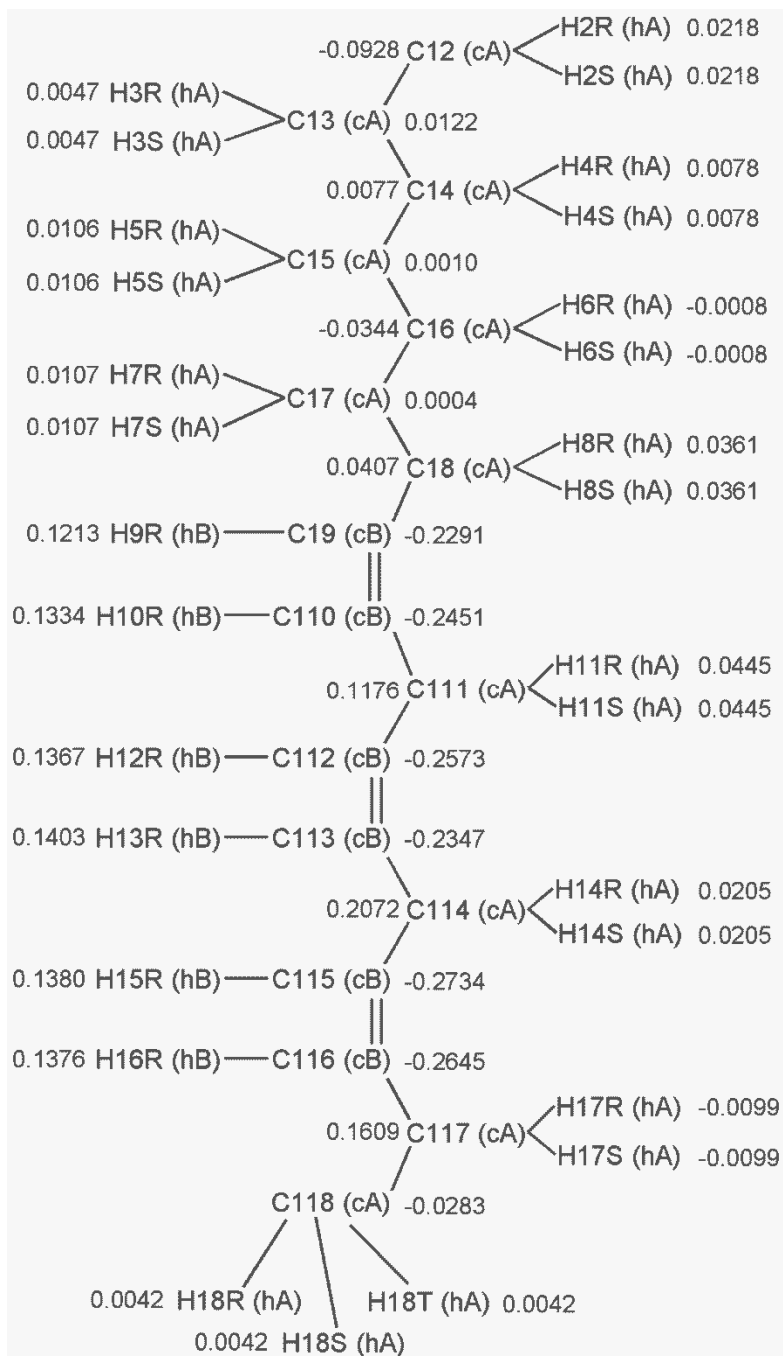

Figure S12. Linolenoyl atom names, atom types, and atom charges. The LIPID11 residue name is LEN.

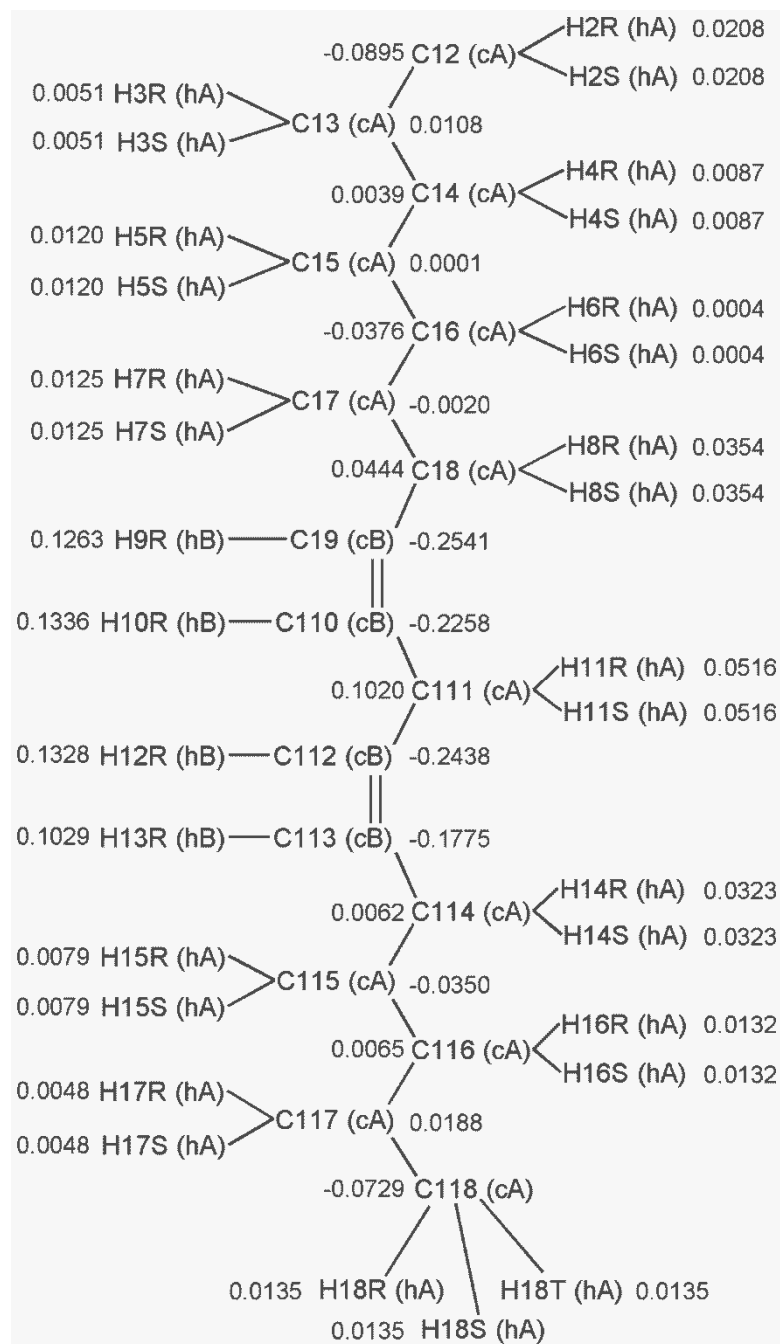

Figure S13. Linoleoyl atom names, atom types, and atom charges. The LIPID11 residue name is LEO.

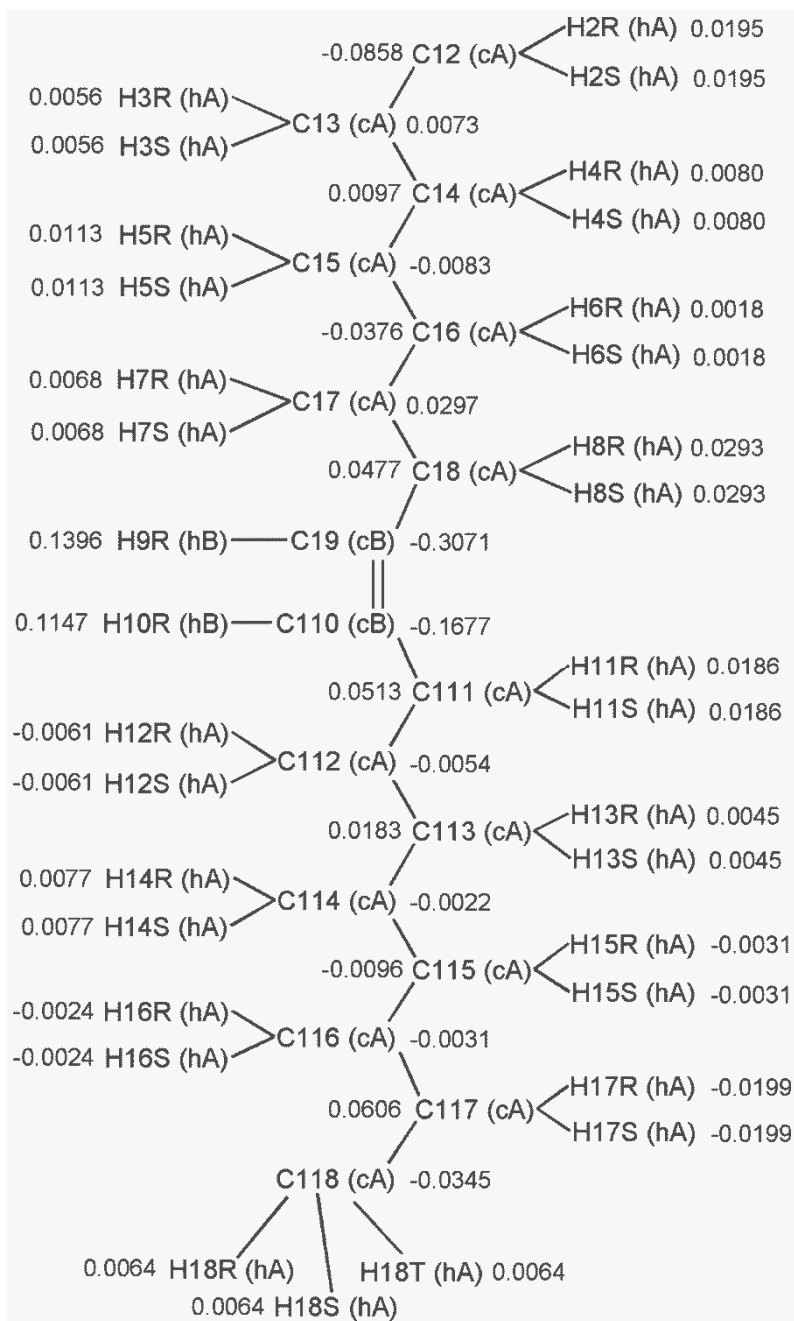

Figure S14. Oleoyl atom names, atom types, and atom charges. The LIPID11 name is OL.



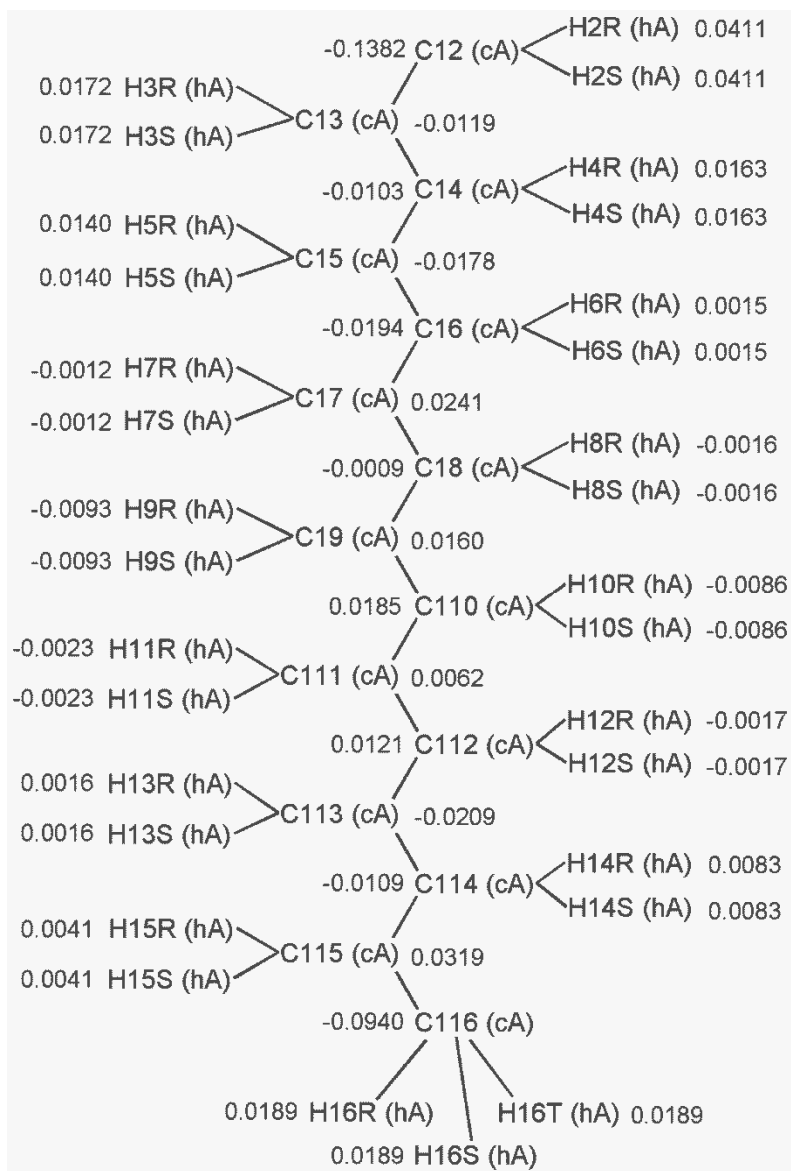

Figure S15. Palmitoyl atom names, atom types, and atom charges. The LIPID11 residue name is PA.

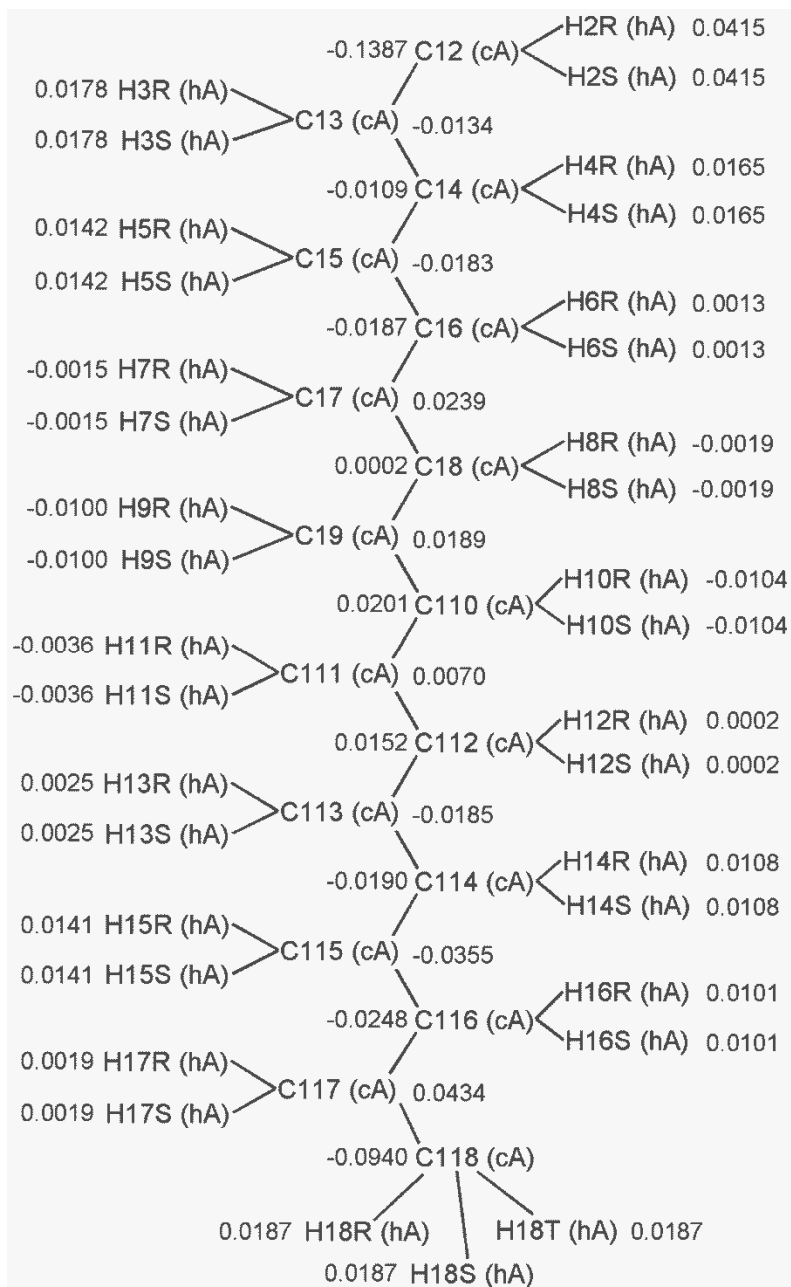

Figure S16. Stearoyl atom names, atom types, and atom charges. The LIPID11 name is ST.
